# Supplementary material for: N-Acyl Homoserine Lactones and Lux Solos Regulate Social Behaviour and Virulence of Pseudomonas syringae pv. actinidiae
Source: Springer Nature journal article supplement (doi:10.1007/s00248-019-01416-5), 2019-07-29
Supplement: MOESM1 [file 248_2019_1416_MOESM1_ESM.pdf]

# **N-acyl homoserine lactones and Lux solos regulate social behaviour and virulence of *Pseudomonas syringae* pv. *actinidiae***

Microbial Ecology

## **Authors:**

Cellini Antonio<sup>1</sup>, Donati Irene<sup>1</sup>, Fiorentini Luca<sup>1</sup>, Vandelle Elodie<sup>2</sup>, Polverari Annalisa<sup>2</sup>, Venturi Vittorio<sup>3</sup>,  
Buriani Giampaolo<sup>1</sup>, Vanneste Joel L.<sup>4</sup>, Spinelli Francesco<sup>1</sup>

1 – Alma Mater Studiorum – Università di Bologna, Department of agricultural and food science, Bologna, Italy

2 – Università degli Studi di Verona, Department of biotechnology, Verona, Italy

3 – International Centre for Genetic Engineering and Biotechnology, Trieste, Italy

4 – The New Zealand Institute for Plant & Food Research, Hamilton, New Zealand

## **Corresponding Author:**

prof. Francesco Spinelli ([francesco.spinelli3@unibo.it](mailto:francesco.spinelli3@unibo.it))

## **Online Resource 1**

List of *Pseudomonas syringae* pv. *actinidiae* genes putatively responding to cell density and/or implied in social behaviour

| Gene           | Source organism                                       | % Identity in Psa | Functional group         | RefSeq ID      | Notes                                                                    | Examples of QS regulation | Forward primer           | Reverse primer            |
|----------------|-------------------------------------------------------|-------------------|--------------------------|----------------|--------------------------------------------------------------------------|---------------------------|--------------------------|---------------------------|
| <i>psaR1</i>   | <i>Pseudomonas syringae</i> pv. <i>actinidiae</i>     | -                 | signalling               | WP_003378621.1 |                                                                          | [27]                      | ATACCTGGTCAGTAGTCTCA     | GCAGCACTTCAAGTTCAC        |
| <i>psaR2</i>   | <i>Pseudomonas syringae</i> pv. <i>actinidiae</i>     | -                 | signalling               | WP_003379651.1 |                                                                          |                           | ACTGTTTGACCAGAAGATG      | CTGAACGGTTGAGTTGAT        |
| <i>psaR3</i>   | <i>Pseudomonas syringae</i> pv. <i>actinidiae</i>     | -                 | signalling               |                |                                                                          | [27]                      | GGTTCGCTCATTATCTGAT      | GCAATGCTTGAGGATAGG        |
| <i>fliP</i>    | <i>Pseudomonas putida</i> W619                        | 82                | motility                 | WP_005616850.1 |                                                                          | [61]                      | TCAAGACGGCGTTTCAGA       | CGGCGAGAGCATCATCAT        |
| <i>pilA</i>    | <i>Pseudomonas syringae</i> pv. <i>tabaci</i>         | 92                | motility                 | WP_020315304.1 |                                                                          | [62,63]                   | GCCATTCTTCATCAA          | GTAAGACCATTGCTCCAG        |
| <i>pilC</i>    | <i>Pseudomonas syringae</i> pv. <i>tomato</i> DC3000  | 90                | motility                 | WP_017684779.1 | type 2 secretion system F family protein                                 |                           | CGCTGGACATCGCATTCT       | GCACCTTCGGCAATGATG        |
| <i>pilO</i>    | <i>Pseudomonas aeruginosa</i> PAO1                    | 75                | motility                 | WP_003378849.1 | type 4a pilus biogenesis lipoprotein PilP                                |                           | CCTACAGAAAGCAGATGGA      | GTGATGCTTCAAGCAGTC        |
| <i>avrPto1</i> | <i>Pseudomonas syringae</i> pv. <i>actinidiae</i>     | -                 | virulence                | WP_003381016.1 | AvrPto1-like protein                                                     | [64]                      | GGAGCGAATCTTGCCATT       | GGAGCGATATGCGTGAAG        |
| <i>hopD1</i>   | <i>Pseudomonas syringae</i> pv. <i>actinidiae</i>     | -                 | virulence                | WP_074291453.1 | effector protein AvrPphD                                                 | [64]                      | CAGTAGACAGCAGTAGCC       | CGGGTTATCGGAAACAAG        |
| <i>hopS2</i>   | <i>Pseudomonas syringae</i> pv. <i>actinidiae</i>     | -                 | virulence                | WP_074291270.1 |                                                                          | [64]                      | CCTTAAACGGCTGGCAGAG      | CGAAGTGATGCTTGAGGTGAA     |
| <i>hopZ5</i>   | <i>Pseudomonas syringae</i> pv. <i>actinidiae</i>     | -                 | virulence                | WP_020314360.1 |                                                                          | [64]                      | TCAGGCTACAATACTTACGCATCA | CAGGAATAGAACGGAAGTCAAGGAT |
| <i>algD</i>    | <i>Pseudomonas syringae</i> pv. <i>tomato</i> DC3000  | 99                | cell aggregation         | WP_017683639.1 | GDP-mannose 6-dehydrogenase                                              | [65]                      | GACCTGGAAGTGGACTACATC    | TGCTGCGAACCACGATAG        |
| <i>wspR</i>    | <i>Pseudomonas fluorescens</i> SBW25                  | 85                | cell aggregation         | WP_003377727.1 | PleD family two-component system response regulator; diguanylate cyclase |                           | ACGACTATCTGGTCAAAGTCTG   | ATAGGCTTCATCACGCTG        |
| <i>wssB</i>    | <i>Pseudomonas fluorescens</i> SBW25                  | 68                | cell aggregation         | WP_017683352.1 |                                                                          | [66]                      | CGCTGGTGATGATGATGTT      | CTGACGCTCAACGCTGTG        |
| <i>rhlA</i>    | <i>Pseudomonas syringae</i> pv. <i>syringae</i> B728a | 70                | Biosurfactant production | WP_032607202.1 | alpha/beta hydrolase                                                     | [67]                      | AGCTGCTTTTGCGATGTAG      | AGATTCCGGTGCTGTTTCATC     |
| <i>syfA</i>    | <i>Pseudomonas syringae</i> pv. <i>syringae</i> B728a | 84                | Biosurfactant production | WP_017699501.1 | non-ribosomal peptide synthase                                           |                           | TGCAACTGGACGAAGAAGAG     | TCGTCGATCAGCACATTGAG      |
| <i>recA</i>    | <i>Pseudomonas syringae</i> pv. <i>actinidiae</i>     | -                 |                          | WP_004397594.1 |                                                                          |                           | CGCACTTGATCCTGAATACG     | CATGTCCGGTATTCCAGTG       |
| <i>rpoD</i>    | <i>Pseudomonas syringae</i> pv. <i>actinidiae</i>     | -                 |                          | WP_017683803.1 |                                                                          |                           | CCGAGATCAAGGACATCAAC     | GAGATCACCAGACGCAAGTT      |
