# Supplementary material for: N-Acyl Homoserine Lactones and Lux Solos Regulate Social Behaviour and Virulence of Pseudomonas syringae pv. actinidiae
Source: Springer Nature journal article supplement (doi:10.1007/s00248-019-01416-5), 2019-07-29
Supplement: MOESM2 [file 248_2019_1416_MOESM2_ESM.pdf]

# **N-acyl homoserine lactones and Lux solos regulate social behaviour and virulence of *Pseudomonas syringae* pv. *actinidiae***

Microbial Ecology

## **Authors:**

Cellini Antonio<sup>1</sup>, Donati Irene<sup>1</sup>, Fiorentini Luca<sup>1</sup>, Vandelle Elodie<sup>2</sup>, Polverari Annalisa<sup>2</sup>, Venturi Vittorio<sup>3</sup>, Buriani Giampaolo<sup>1</sup>, Vanneste Joel L.<sup>4</sup>, Spinelli Francesco<sup>1</sup>

1 – Alma Mater Studiorum – Università di Bologna, Department of agricultural and food science, Bologna, Italy

2 – Università degli Studi di Verona, Department of biotechnology, Verona, Italy

3 – International Centre for Genetic Engineering and Biotechnology, Trieste, Italy

4 – The New Zealand Institute for Plant & Food Research, Hamilton, New Zealand

## **Corresponding Author:**

prof. Francesco Spinelli ([francesco.spinelli3@unibo.it](mailto:francesco.spinelli3@unibo.it))

## **Online Resource 2**

(a) Growth of *Pseudomonas syringae* pv. *actinidiae* (Psa) in cell-free supernatants of *P. putida* strain IBE3, *P. syringae* pv. *syringae*, *P. viridiflava* and *P. fluorescens*. (b) Growth of Psa in cell-free supernatants of low density (LD) or high density (HD) Psa cultures. (c) percentage of Psa cultures showing swarming motility after treatment with 1  $\mu$ M C6-OH-, C8-OH-, C10-OH- or C12-OH-homoserine lactone (HSL) solutions in phosphate buffer saline. (d) production of biofilm by Psa after treatment with 0.25  $\mu$ M C6-OH-, C8-OH-, C10-OH- or C12-OH-HSL. (e) expression of genes related to biosurfactant production in wild-type Psa grown in LD or HD culture supernatants, and in presence/absence of 1  $\mu$ M C6-OH-HSL, indicated as relative amount of transcript compared to the housekeeping genes *recA* and *rpoD*. (f) table of *p* values obtained by two-way

ANOVA on gene expression data presented in fig. 5, considering concentration (0, 0.25 or 1  $\mu\text{M}$ ) and molecule (C6-OH- or C8-OH-HSL) as the factors. Significant effects ( $p \leq 0.05$ ) are highlighted in bold. ANOVA followed by Tukey's test (a, b, d, e) or Marascuilo's test (c) were performed. Different letters indicate significant differences

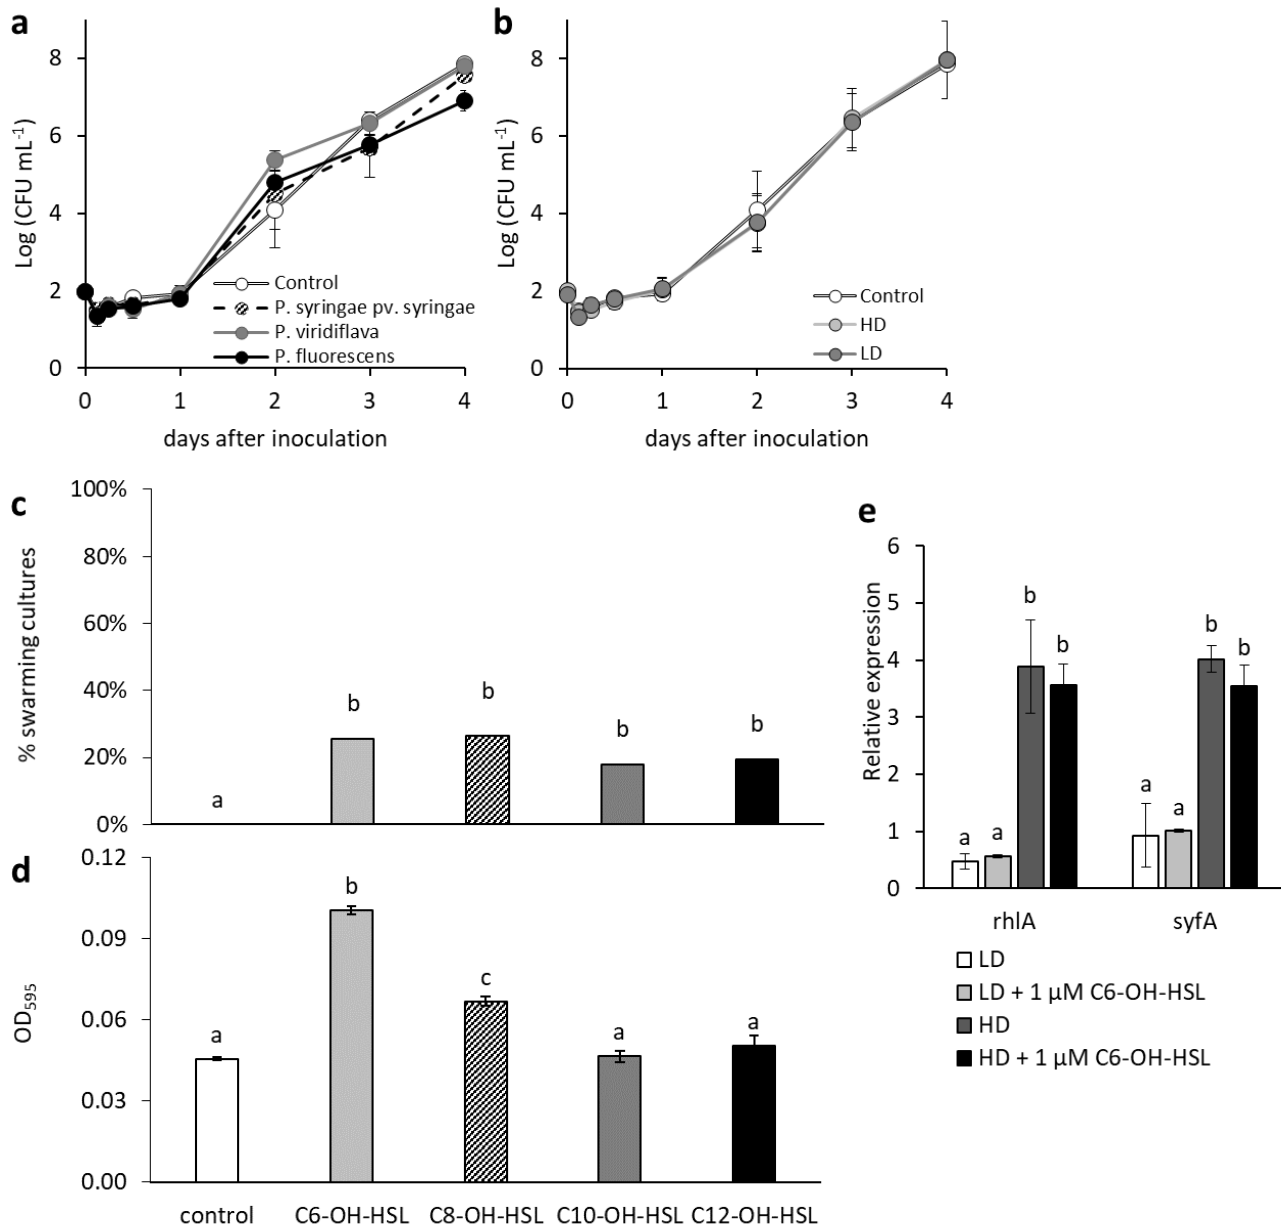

| <b>f</b>                                     | fliP         | rpoN         | pilA         | pilC         | pilO         | algD         | wssB         | wspR         | hopZ5        | avrPto1      | hopD1        | hopS2        | psaR1 | psaR2 | psaR3 |
|----------------------------------------------|--------------|--------------|--------------|--------------|--------------|--------------|--------------|--------------|--------------|--------------|--------------|--------------|-------|-------|-------|
| Concentration                                | <b>0.000</b> | <b>0.000</b> | <b>0.000</b> | <b>0.000</b> | <b>0.001</b> | <b>0.000</b> | <b>0.014</b> | <b>0.000</b> | <b>0.008</b> | <b>0.006</b> | <b>0.000</b> | <b>0.062</b> | 0.114 | 0.518 | 0.159 |
| Molecule                                     | 0.051        | 0.097        | 0.071        | 0.140        | <b>0.014</b> | 0.980        | 0.431        | <b>0.002</b> | 0.076        | 0.052        | 0.195        | 0.503        | 0.783 | 0.242 | 0.135 |
| Interaction<br>(Concentration<br>× Molecule) | <b>0.045</b> | 0.129        | 0.051        | <b>0.034</b> | <b>0.007</b> | 0.872        | 0.575        | <b>0.002</b> | 0.267        | <b>0.028</b> | 0.553        | 0.878        | 0.129 | 0.409 | 0.307 |
